# Supplementary material for: Synthesis of tetrazine-tetracyanobutadienes and their transformation into pyridazines via inverse-electron demand Diels–Alder cycloaddition (IEDDA)
Source: Royal Society of Chemistry journal article supplement (doi:10.1039/d3ob00595j), 2023-01-01
Supplement: d3ob00595j1.pdf [file d3ob00595j1.pdf]

## Synthesis of Tetrazine-Tetracyanobutadienes and Their Transformation to Pyridazines *via* Inverse-electron Demand Diels-Alder Cycloaddition (IEDDA)

Abhijeet V. Kamble, Aswani Raj K and Rajeswara Rao M\*

Department of Chemistry, IIT Dharwad, Dharwad-580011, Karnataka, India

| <b>Sr. no.</b> | <b>Content</b>                                                                                              | <b>Page no.</b> |
|----------------|-------------------------------------------------------------------------------------------------------------|-----------------|
| 1              | HR-MS spectra, <sup>1</sup> H NMR, <sup>13</sup> C NMR, COSY NMR                                            | 2-11            |
| 2              | DFT optimized TCNQ based molecules                                                                          | 12              |
| 3              | DFT computed absorption spectra of <b>1</b> , <b>1T</b> , <b>1DT</b> , <b>1T-P</b> & <b>1DT-P</b>           | 12              |
| 4              | Reduction and Oxidation potential of compound <b>1</b> , <b>1T</b> , <b>1DT</b> , <b>1T-P</b> , <b>2T-P</b> | 13              |
| 5              | Absorption spectra of <b>1DT</b> with different anions.                                                     | 14              |
| 6              | UV-Vis spectra of <b>1T</b> with CN <sup>-</sup>                                                            | 15              |

| <b>Sr. no.</b> | <b>Table</b>         | <b>Page no.</b> |
|----------------|----------------------|-----------------|
| 1              | Electrochemical data | 14              |

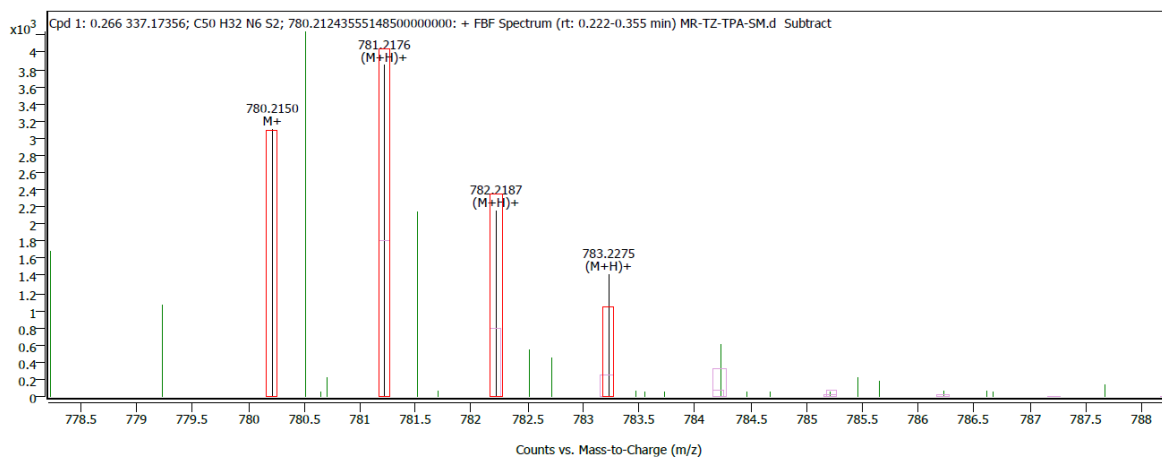

**Figure S1.** HR-MS spectra of compound **1**

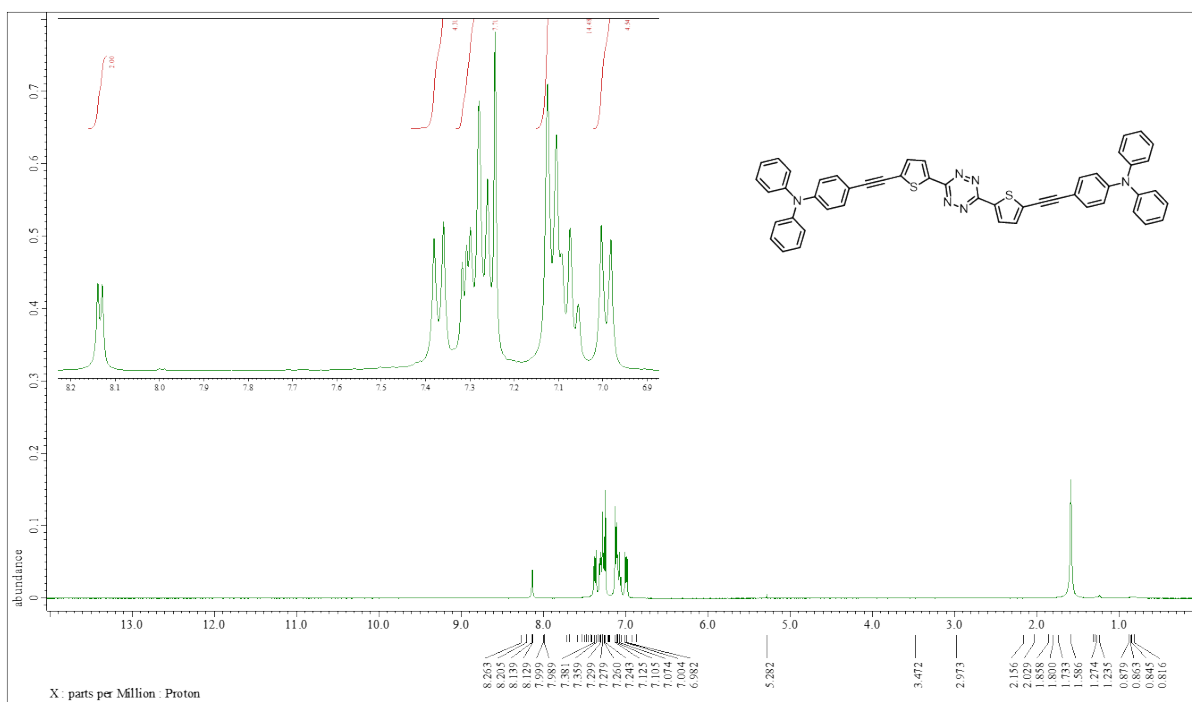

**Figure S2.**  $^1\text{H}$  NMR spectra of compound **1**

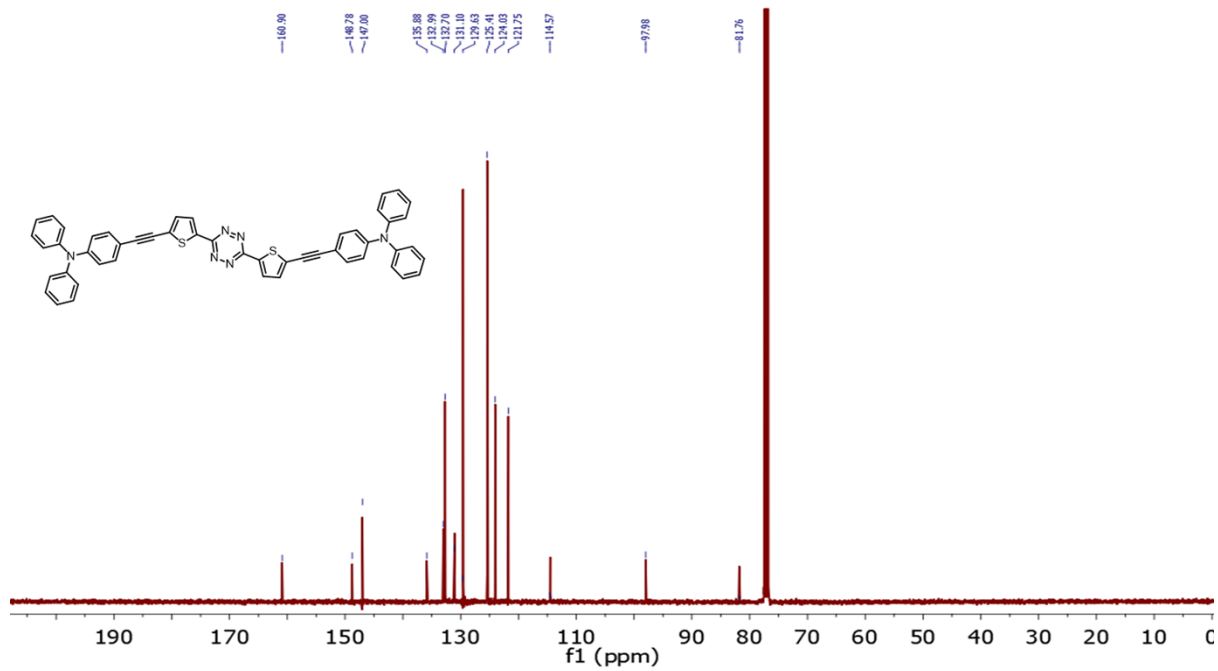

Figure S3.  $^{13}\text{C}$  NMR spectra of compound 1

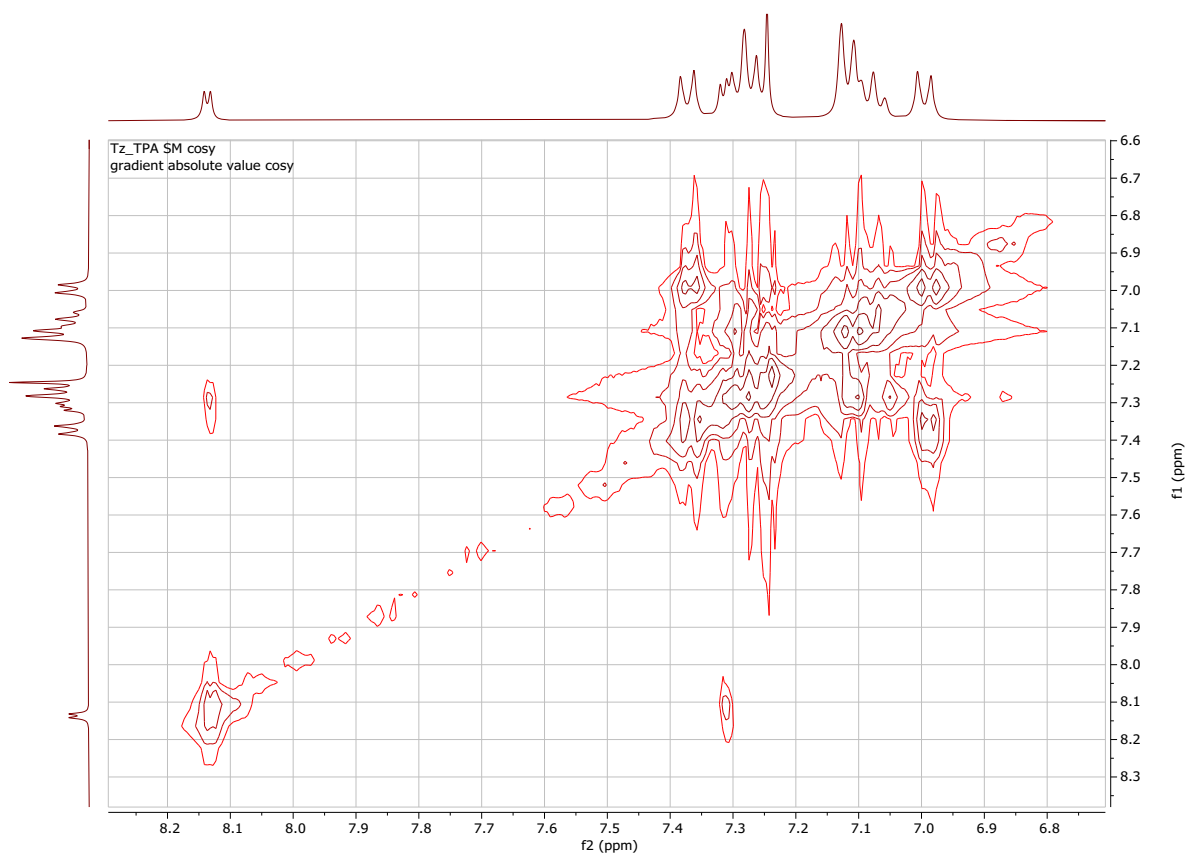

Figure S4. COSY NMR spectra of compound 1

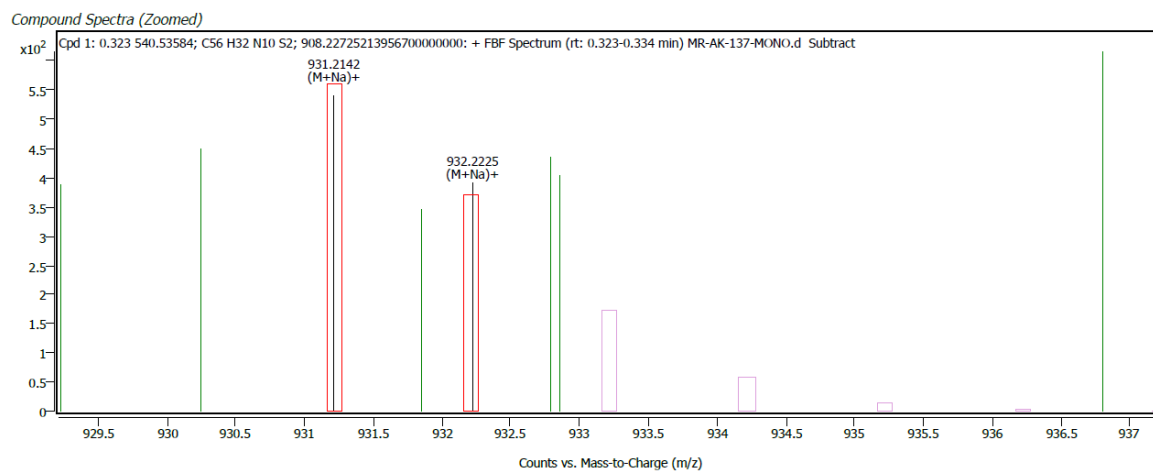

Figure S5. HR-MS spectra of compound 1T

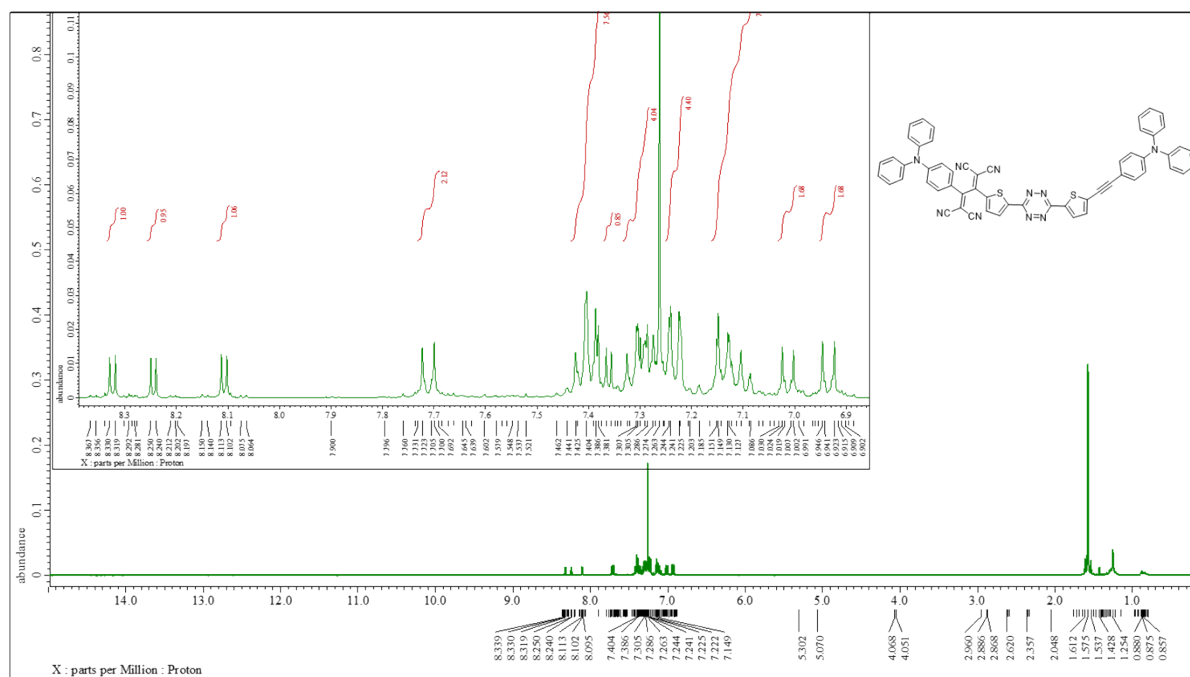

Figure S6.  $^1\text{H}$  NMR spectra of compound 1T

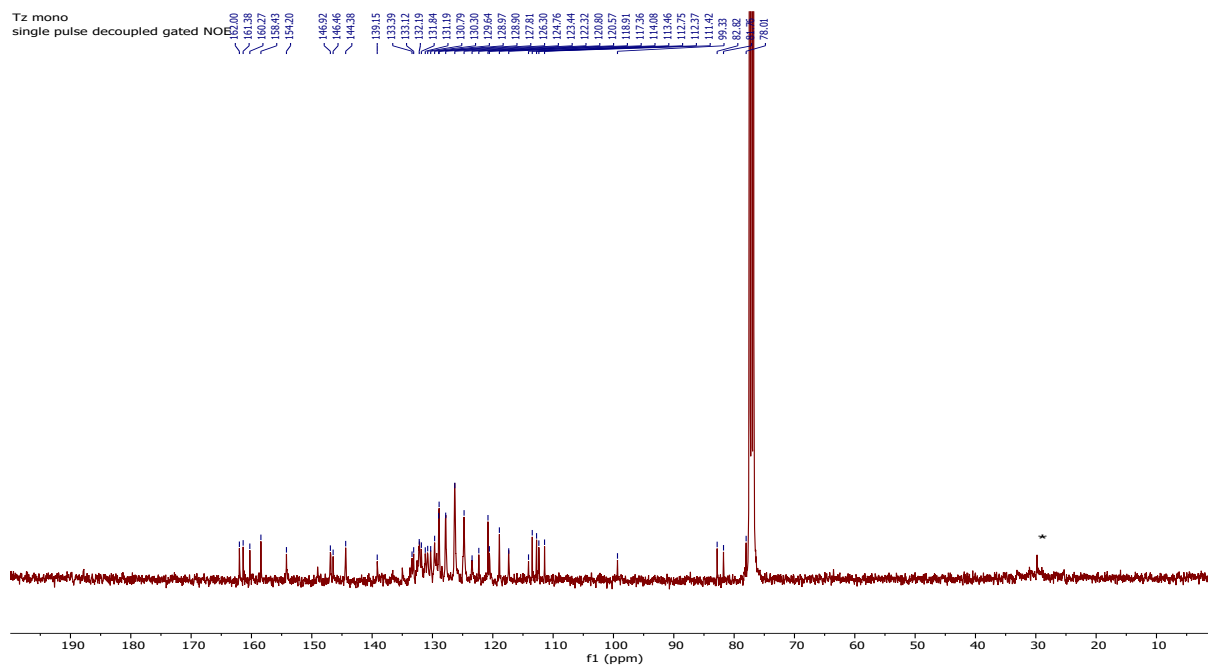

**Figure S7.**  $^{13}\text{C}$  NMR spectra of compound **1T**

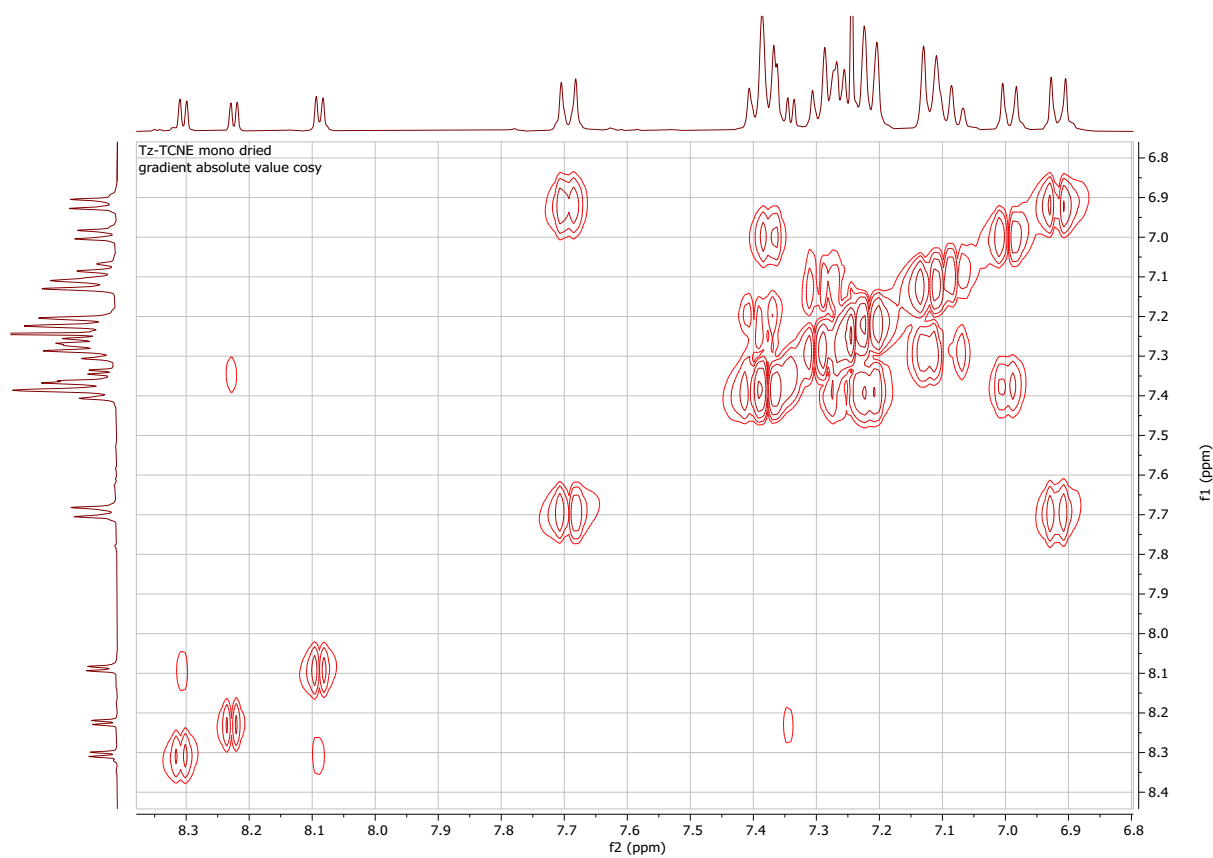

**Figure S8.** COSY NMR spectra of compound **1T**

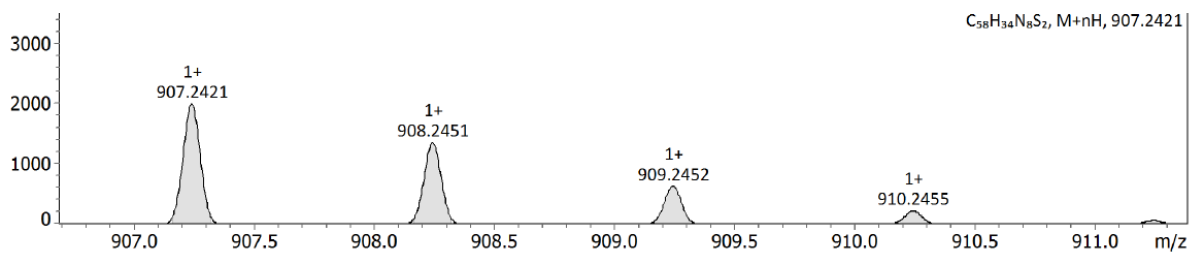

Figure S7. HR-MS spectra of compound 1T-P

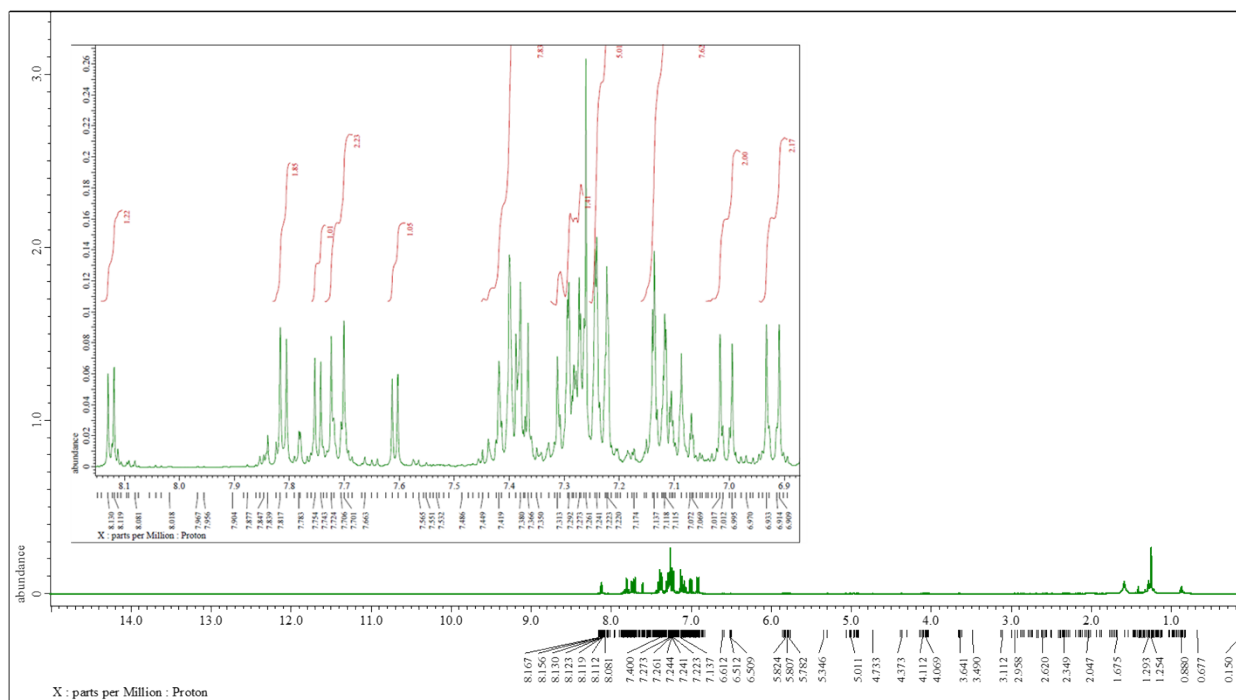

Figure S9.  $^1H$  NMR spectra of compound 1T-P

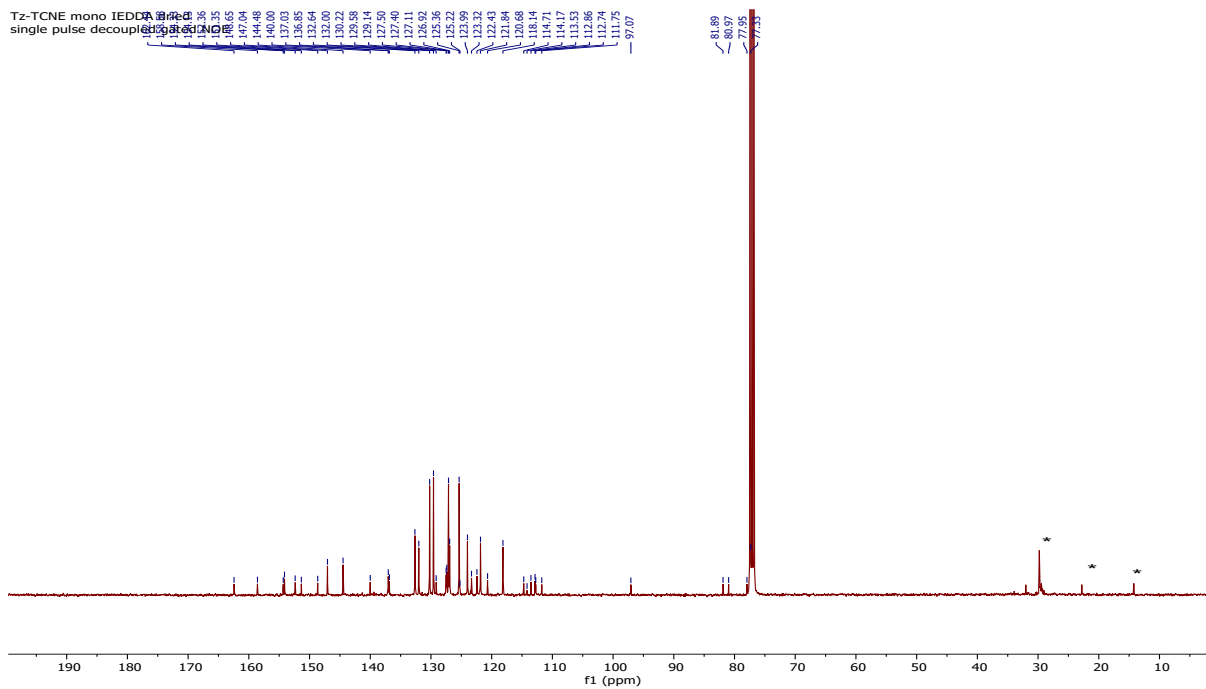

Figure S10.  $^{13}\text{C}$  NMR spectra compound 1T-P

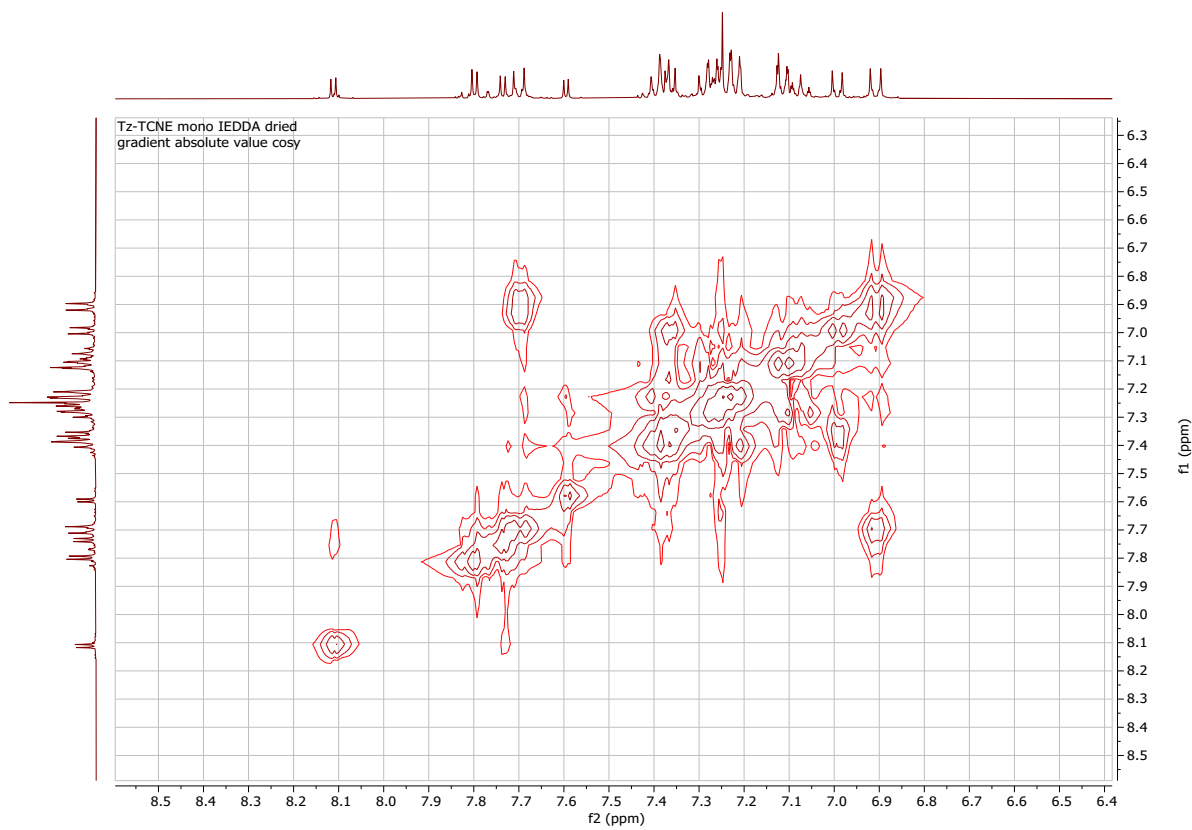

Figure S11. COSY NMR spectra of compound 1T-P

Compound Spectra (Zoomed)

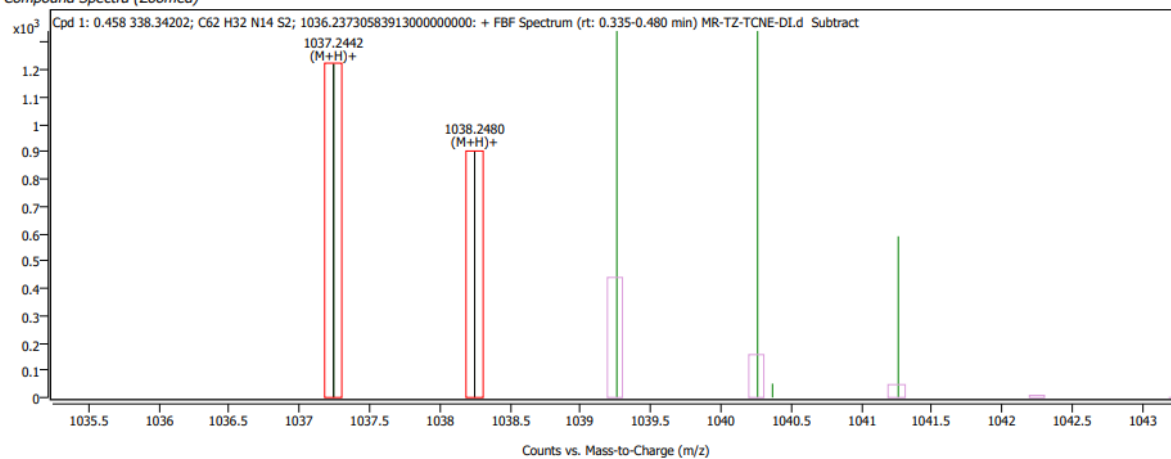

Figure S12. HR-MS spectra of compound 1DT

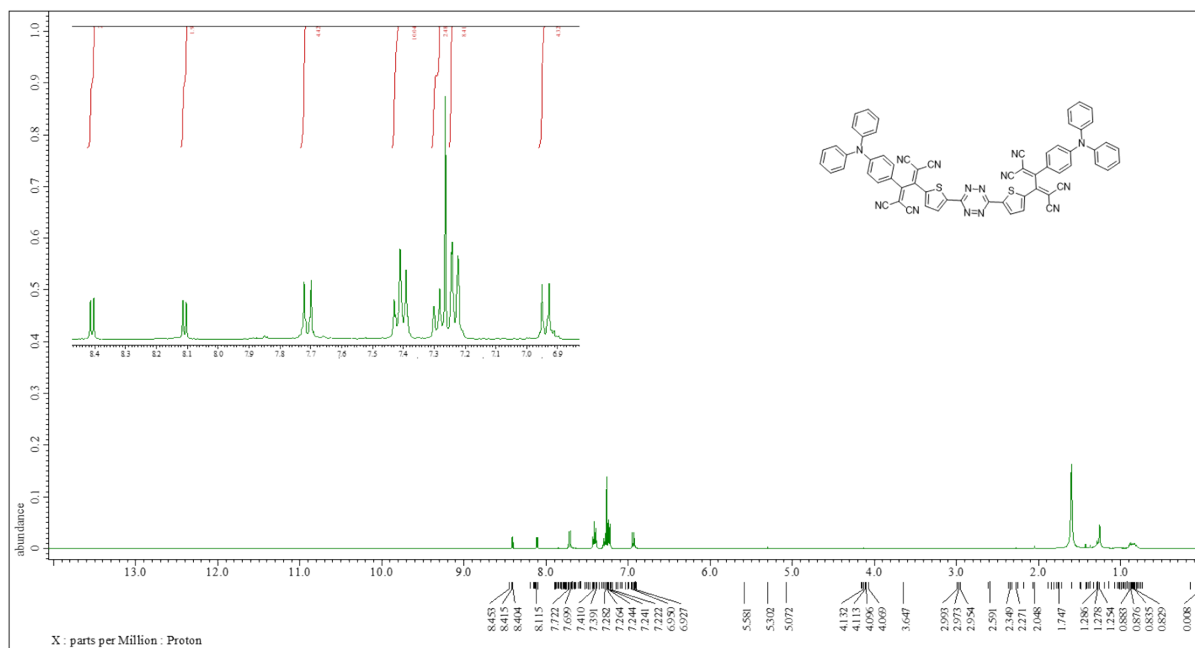

Figure S13. <sup>1</sup>H NMR spectra of compound 1DT



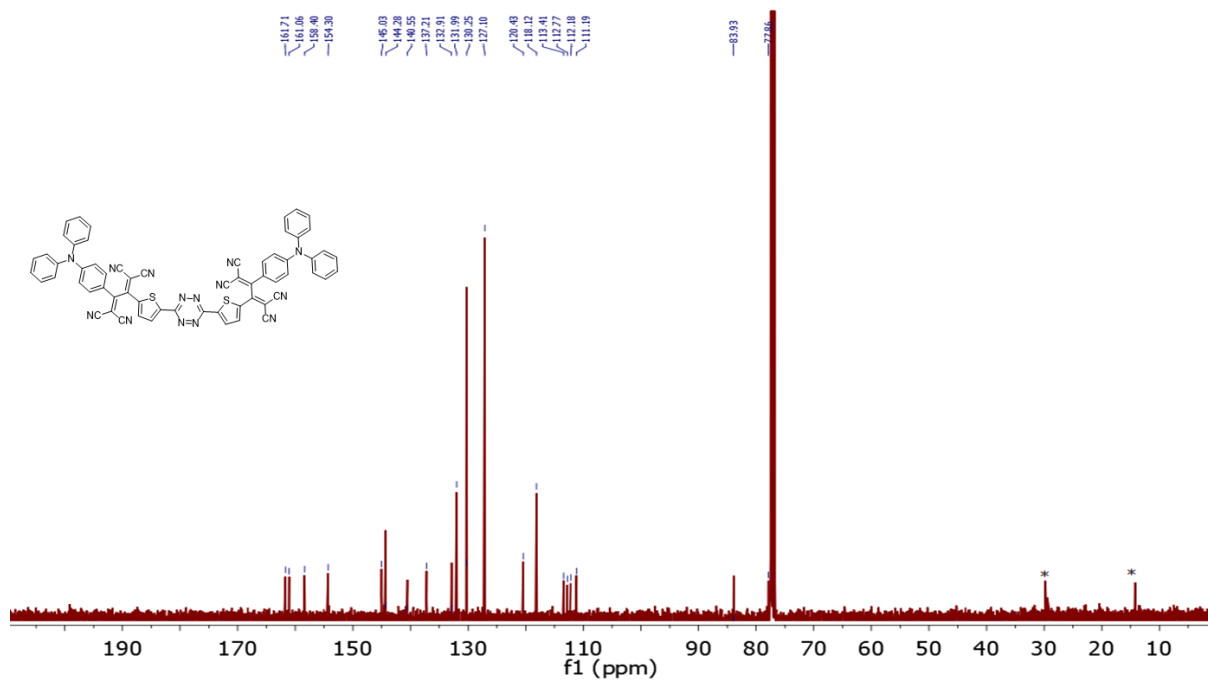

**Figure S14.**  $^{13}\text{C}$  NMR spectra of compound **1DT**

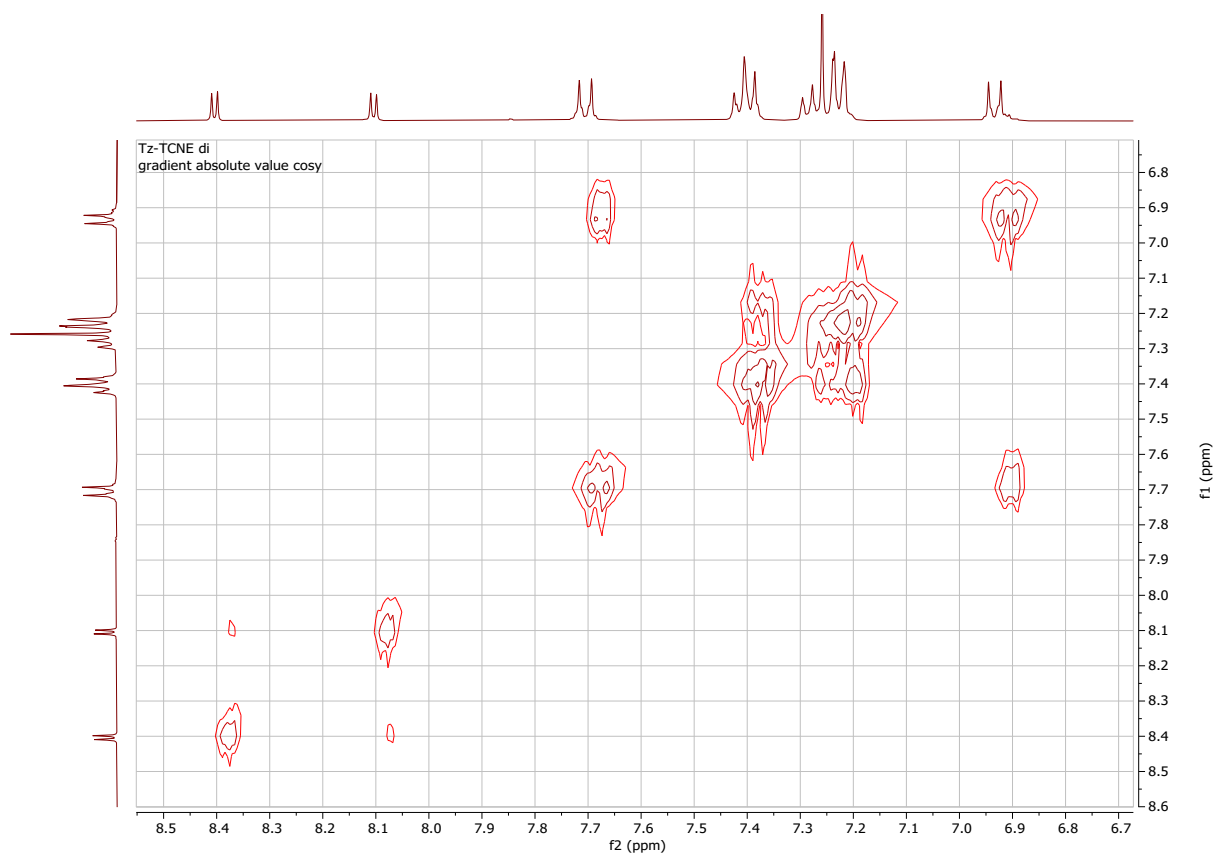

**Fig. S15.** COSY NMR spectra of compound **1DT**

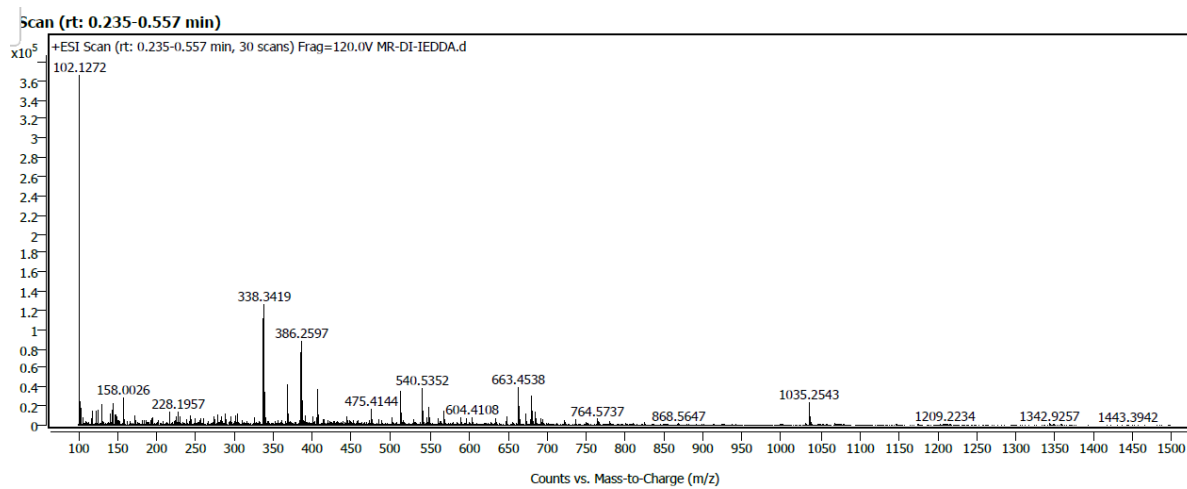

Fig. S16. HR-MS spectra of compound 1DT-P

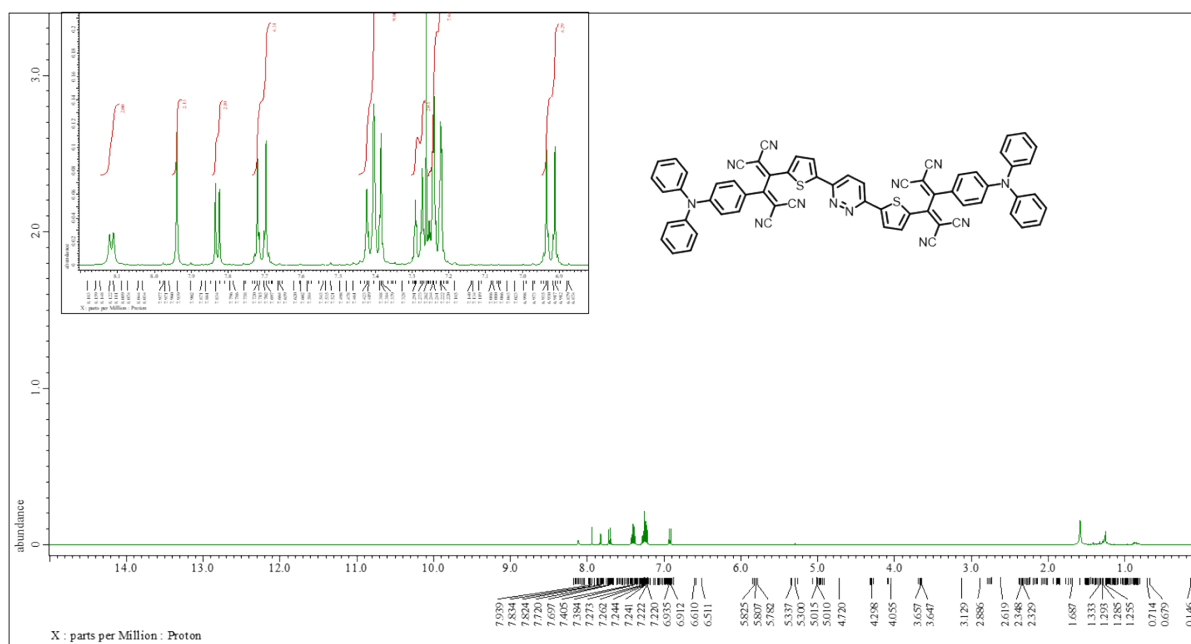

Fig. S17. <sup>1</sup>H NMR spectra of compound 1DT-P

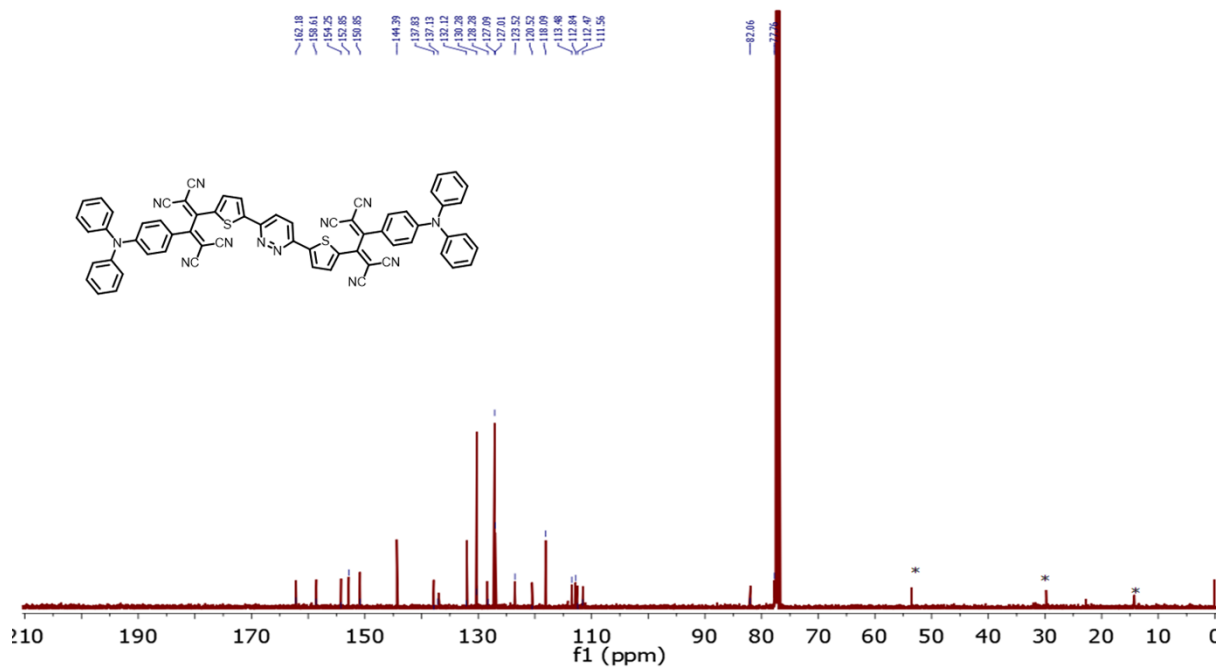

**Fig. S18.**  $^{13}\text{C}$  NMR spectra of compound **1DT-P**

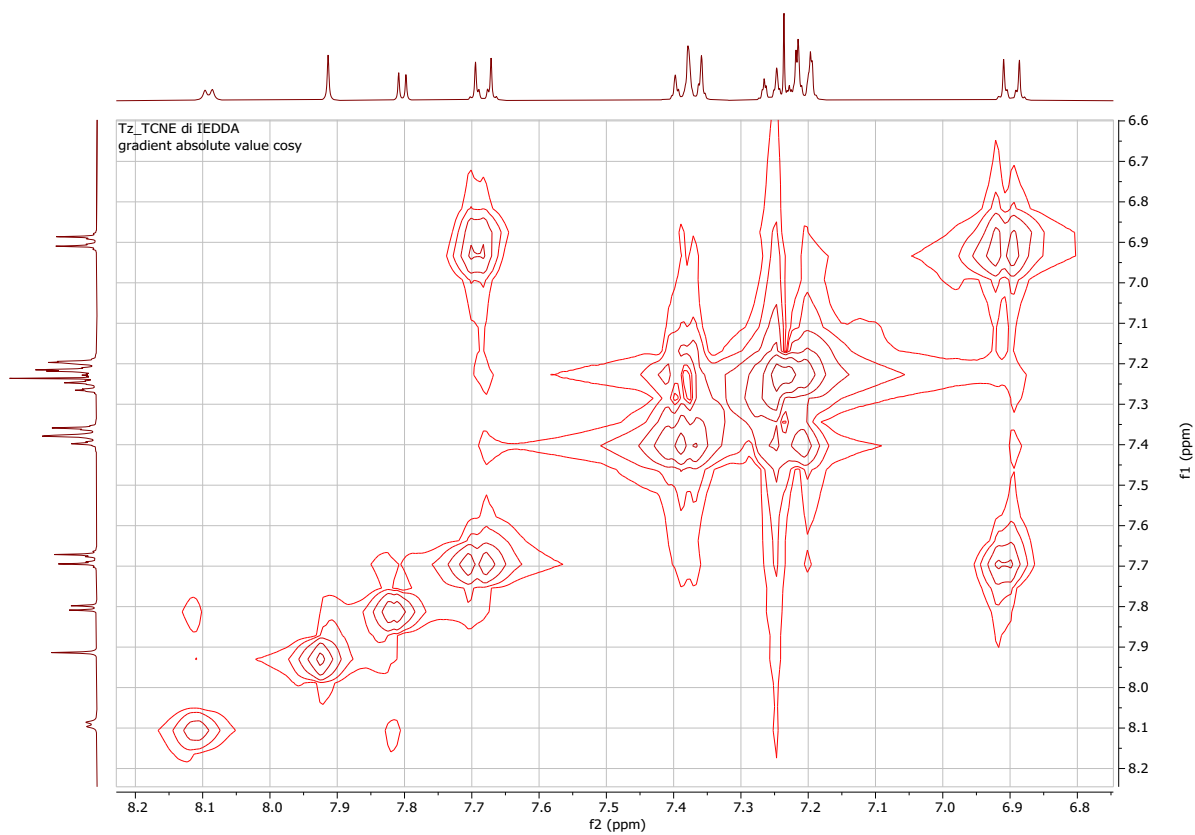

**Fig. S19.** COSY NMR spectra of compound **1DT-P**

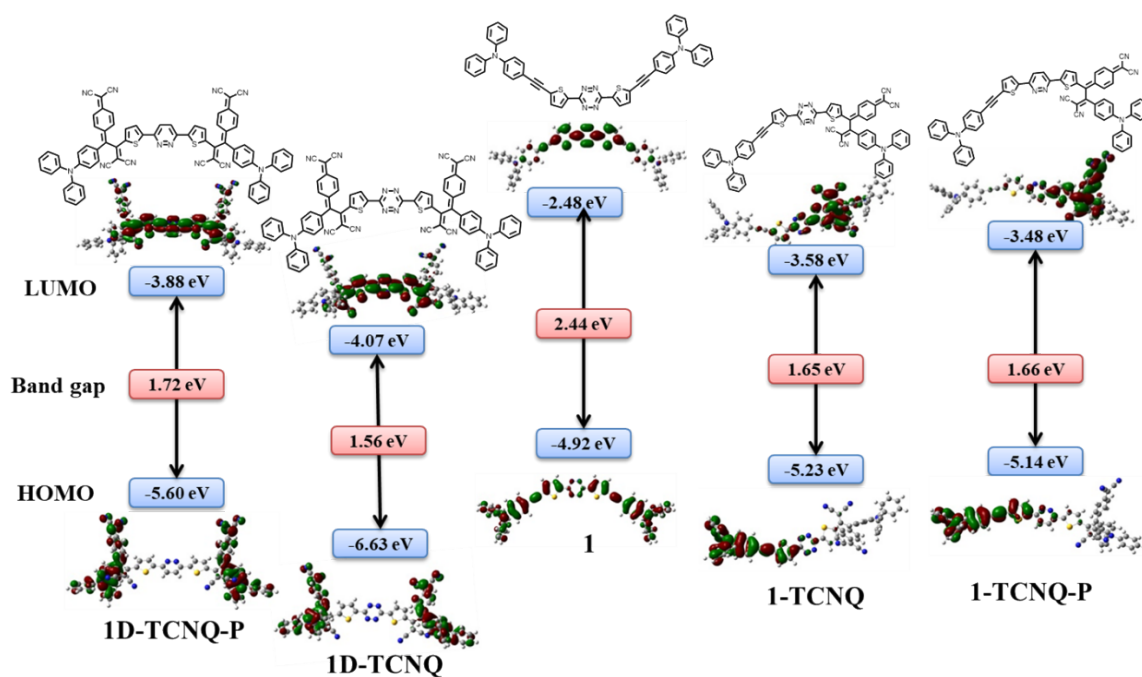

**Fig. S20.** DFT estimated HOMO-LUMO energies and the contours of **1**, cyclohexa-2,5-diene-1,4-diylidene-expanded TCBD-based molecules (**1-TCNQ**, **1D-TCNQ**) and (**1-TCNQ-P**, **1D-TCNQ-P**).

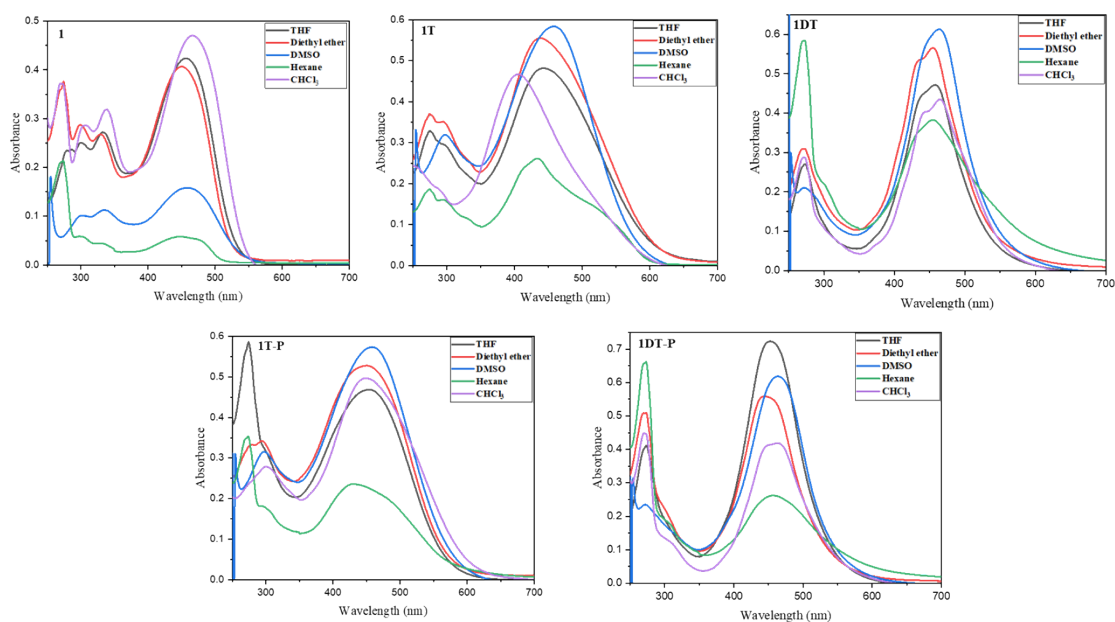

**Fig. S21.** Absorption spectra of **1**, **1T**, **1DT**, **1T-P** & **1DT-P** in different solvent

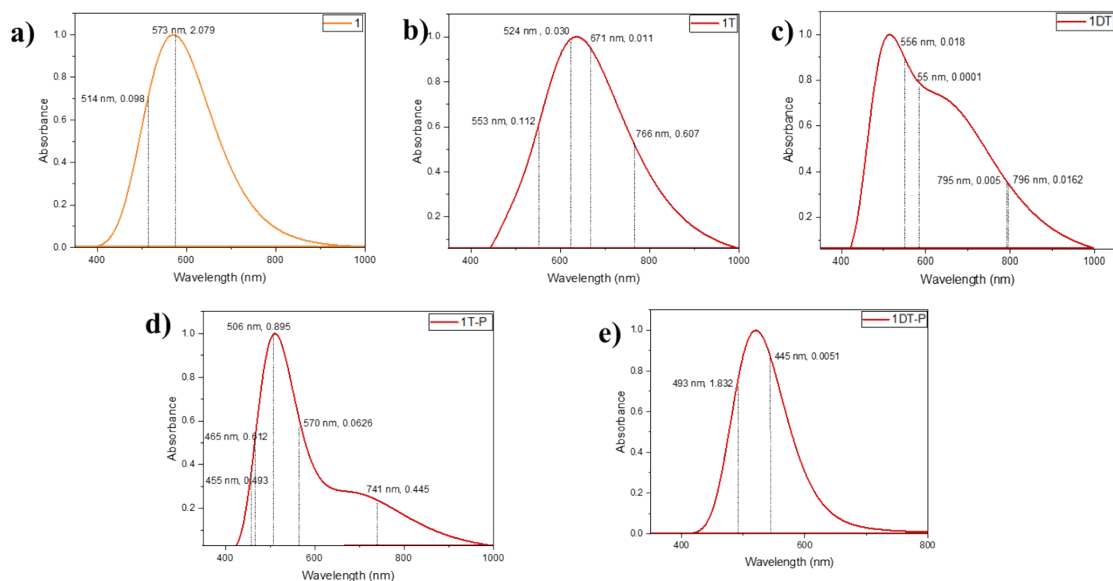

**Fig. S22.** Theoretically calculated UV-Vis absorption spectra obtained by time-dependent DFT at the B3LYP/6-31G level of theory

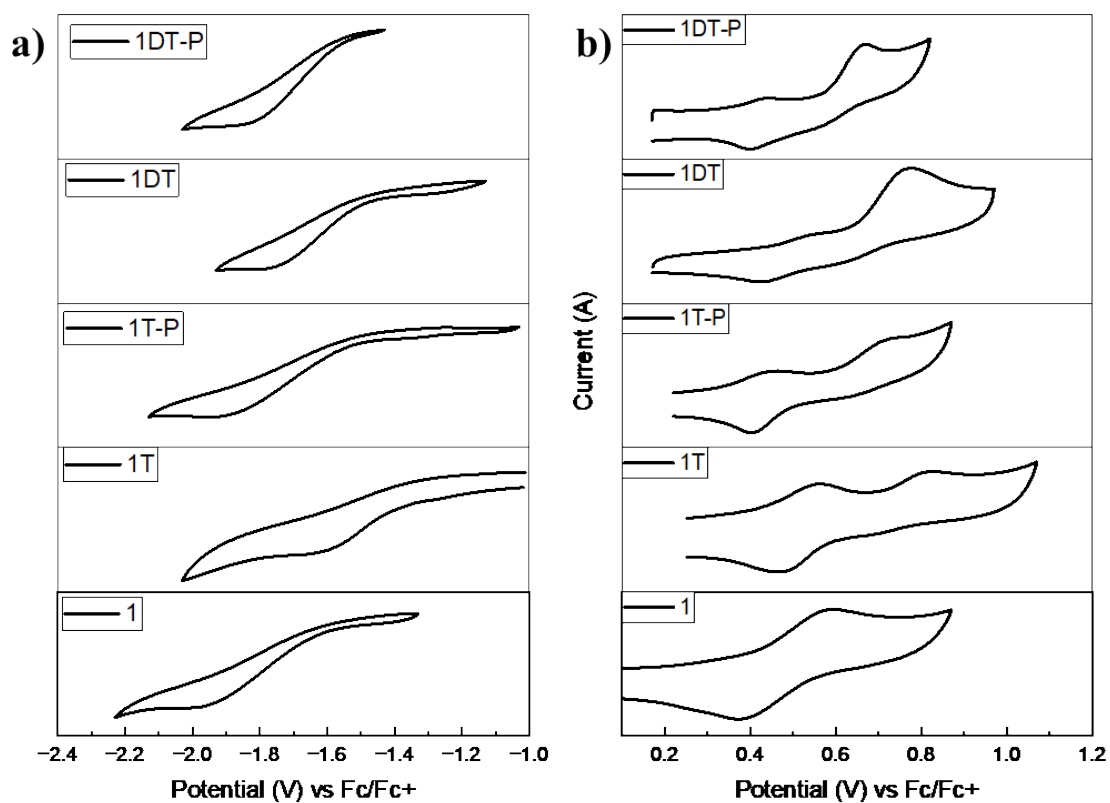

**Fig. S23.** a) Reduction potential of compound 1, 1T, 1DT, 1T-P, 1DT-P; b) Oxidation potential of compound 1, 1T, 1DT, 1T-P, 2T-P

**Table S1.** Electrochemical data of **1**, **1T**, **1DT**, **1T-P** & **1DT-P**

| Compound     | Oxidation  |            | Reduction |           | HOMO         | LUMO  | Band gap (eV) |
|--------------|------------|------------|-----------|-----------|--------------|-------|---------------|
|              | Ag/AgCl    | Ferrocene  | Ag/AgCl   | Ferrocene |              |       |               |
| <b>1</b>     | 1.09       | 0.46       | -1.15     | -1.78     | -5.26        | -3.02 | 2.24          |
| <b>1T</b>    | 1.12, 1.36 | 0.49, 0.73 | -0.85     | -1.48     | -5.29, -5.53 | -3.32 | 1.97          |
| <b>1T-P</b>  | 1.05, 1.28 | 0.42, 0.65 | -1.06     | -1.69     | -5.22, -5.45 | -3.11 | 2.11          |
| <b>1DT</b>   | 1.32       | 0.69       | -0.98     | -1.61     | 5.49         | -3.19 | 2.30          |
| <b>1DT-P</b> | 1.24       | 0.61       | -1.05     | -1.68     | -5.41        | -3.12 | 2.29          |

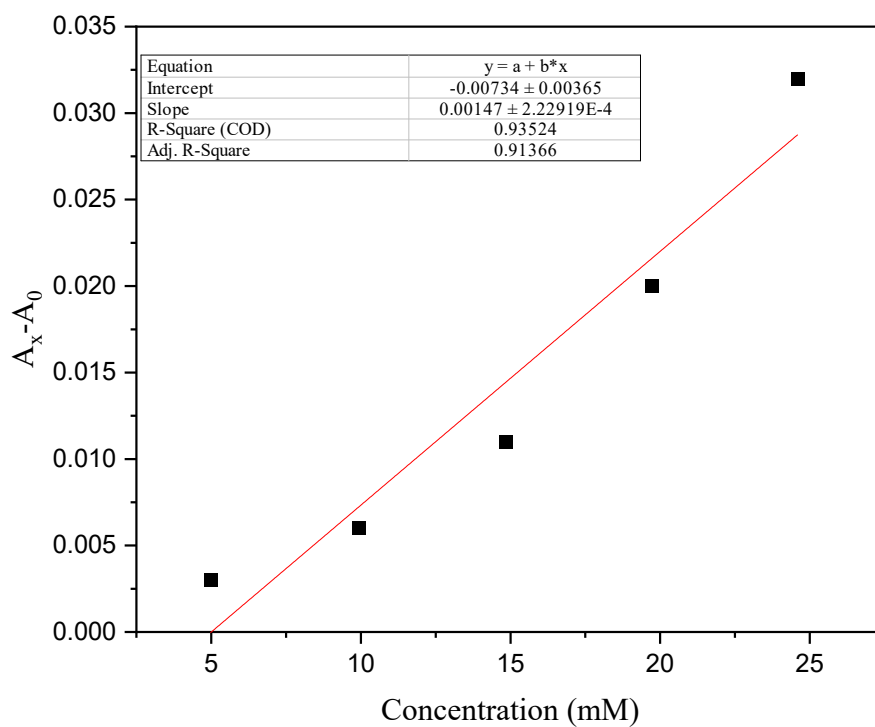**Fig. S24.** Limit of detection plot of 1DT with CN<sup>-</sup>

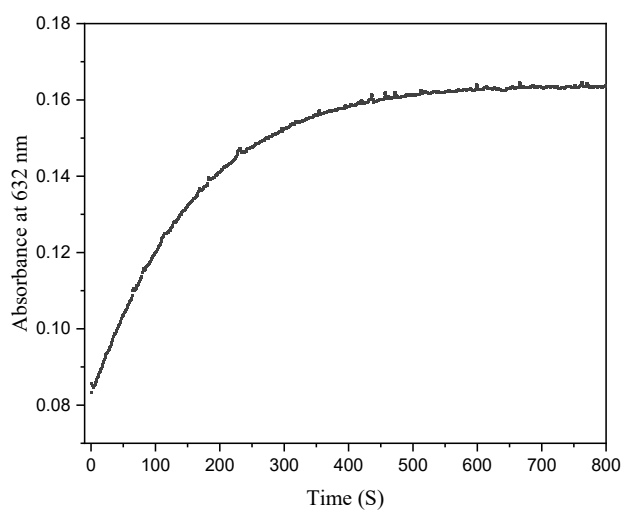

**Fig. S25.** Absorbance changes of 1DT at 632 nm as a function of time after CN<sup>-</sup> addition.

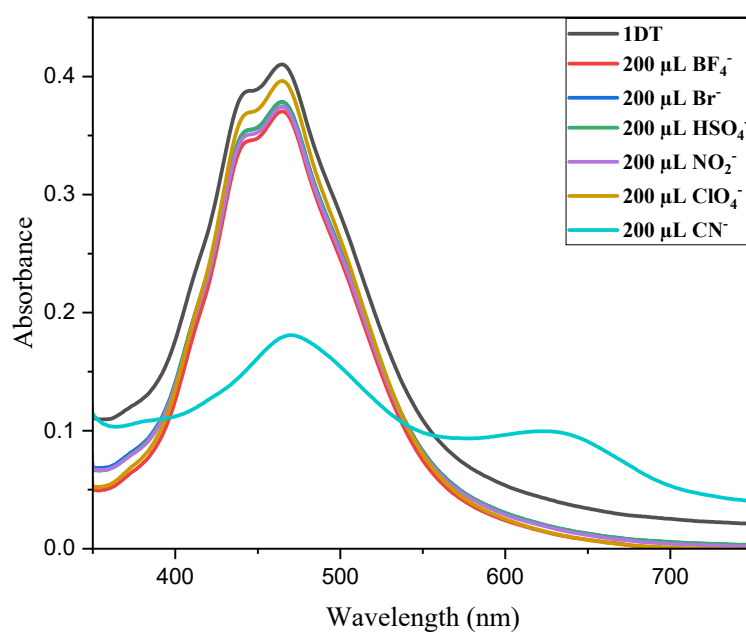

**Fig. S26.** Absorption spectra of 1DT (10<sup>-5</sup> M in CHCl<sub>3</sub>) with different anions.

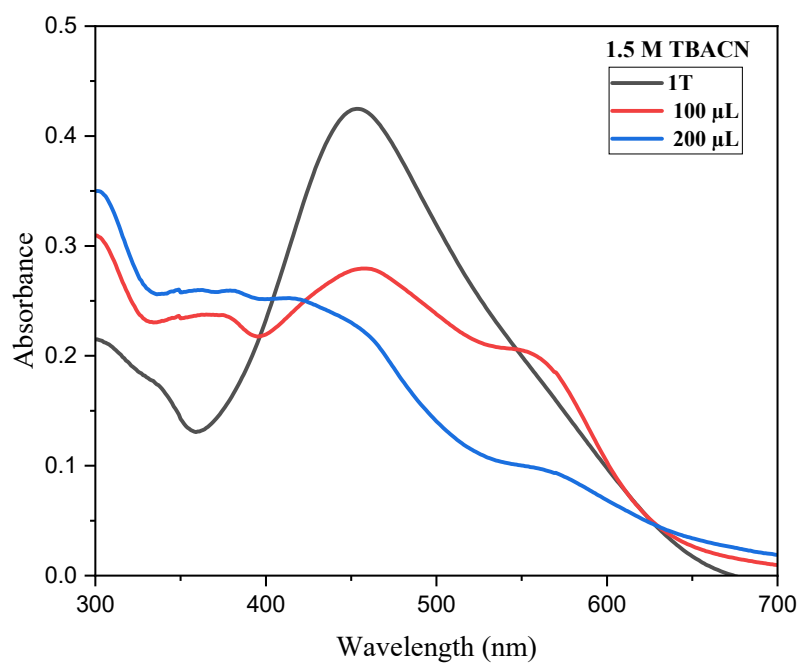

**Fig. S27.** UV-Vis spectra of **1T** ( $10^{-5}$  M) with  $\text{CN}^-$  (1.5 M)

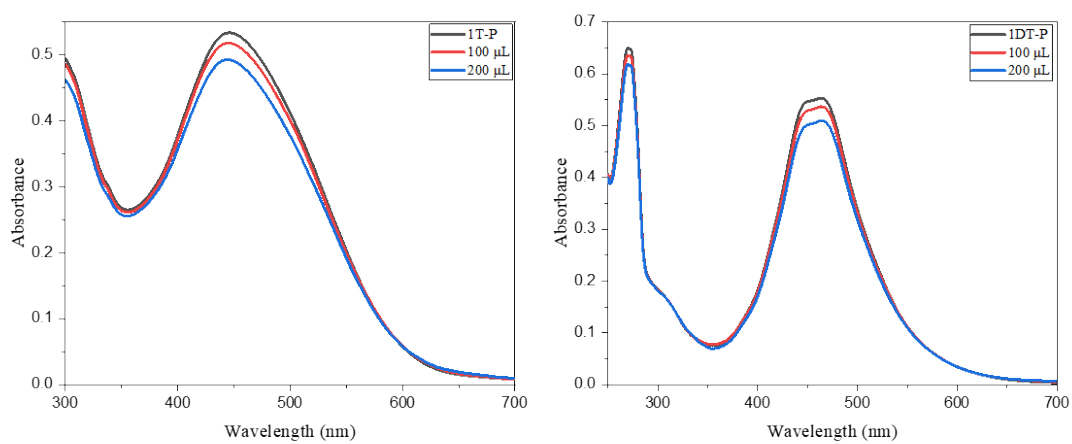

**Fig. S28.** UV-Vis spectra of **1T-P** & **1DT-P** ( $10^{-5}$  M) with  $\text{CN}^-$  (1.5 M)
